# Supplementary material for: A nitrogen and cobalt co-doped titanium dioxide framework as a stable catalyst support for polymer electrolyte fuel cells
Source: Royal Society of Chemistry journal article supplement (doi:10.1039/c6ra18083c), 2016-01-01
Supplement: c6ra18083c1.pdf [file c6ra18083c1.pdf]

# Nitrogen and cobalt co-doped titanium dioxide framework as stable catalyst support for polymer electrolyte fuel cells

P. Dhanasekaran, S. Vinod Selvaganesh and Santoshkumar. D. Bhat\*

CSIR-Central Electrochemical Research Institute, CSIR Madras Complex, Chennai,  
Tamil Nadu, India

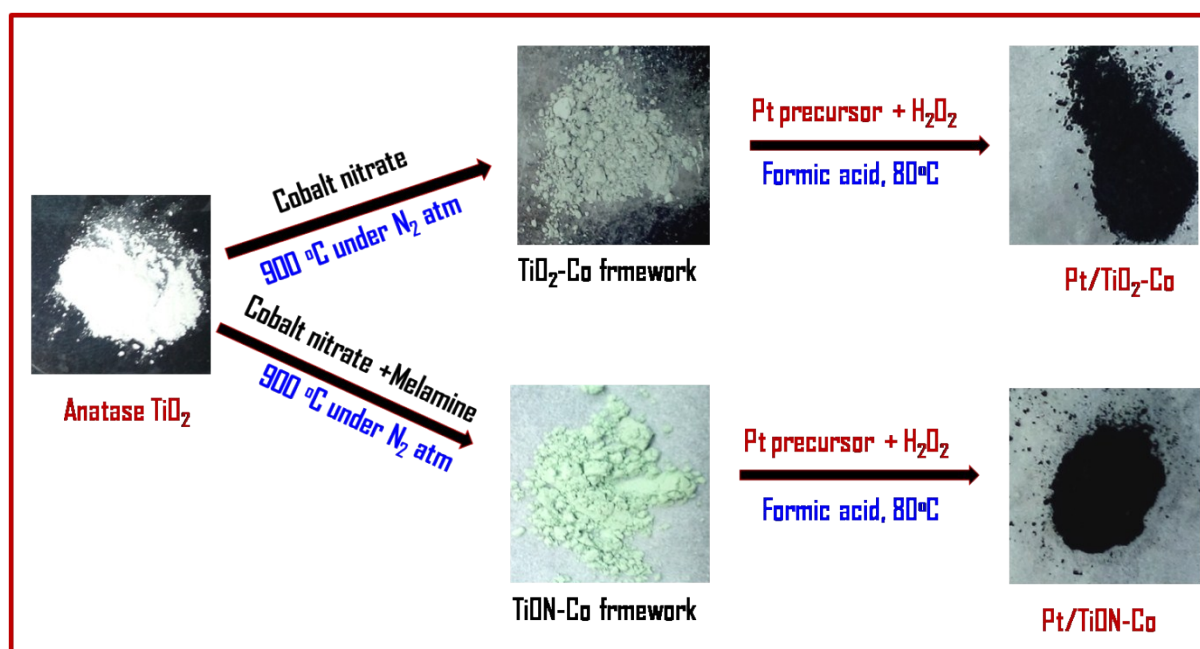

**Scheme 1:** Various stages of colour change are observed for preparation of Pt deposited on TiO<sub>2</sub> electrocatalysts.

**Table 1:** EDX of various cathode electrocatalysts

| Type                    | Pt (Wt. %) | C (Wt. %) | N (Wt. %) | Co (Wt. %) | Ti (Wt. %) | O (Wt. %) |
|-------------------------|------------|-----------|-----------|------------|------------|-----------|
| Pt/C                    | 39-41      | 59-61     | ----      | ----       | ----       | ----      |
| Pt/TiO <sub>2</sub> -Co | 40-42      | ----      | ----      | 1.5-2.00   | 34-36      | 21-23     |
| Pt/TiON-Co/             | 40-42      | 2.5-3.5   | 6-8       | 1.5-2.00   | 30-32      | 15-17     |

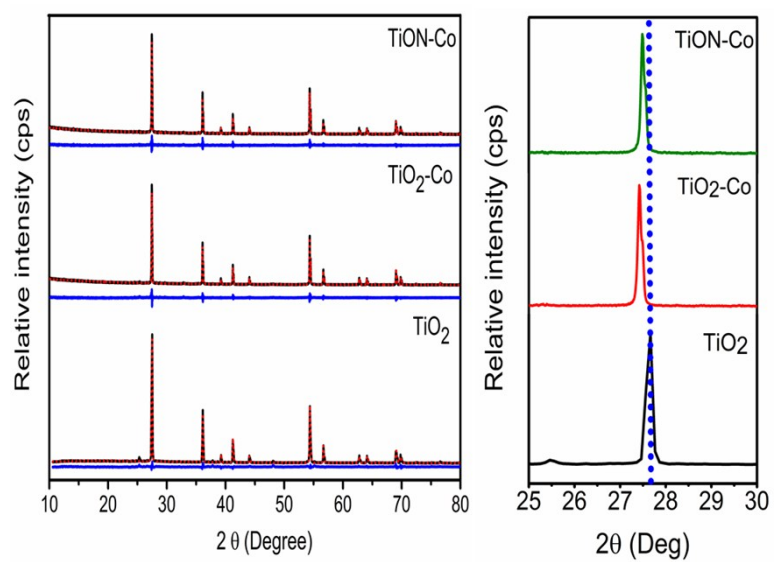

**Fig. 1S.** XRD refinement for TiO<sub>2</sub>, TiO<sub>2</sub>-Co and TiON-Co and their major plane (110) peak shift.

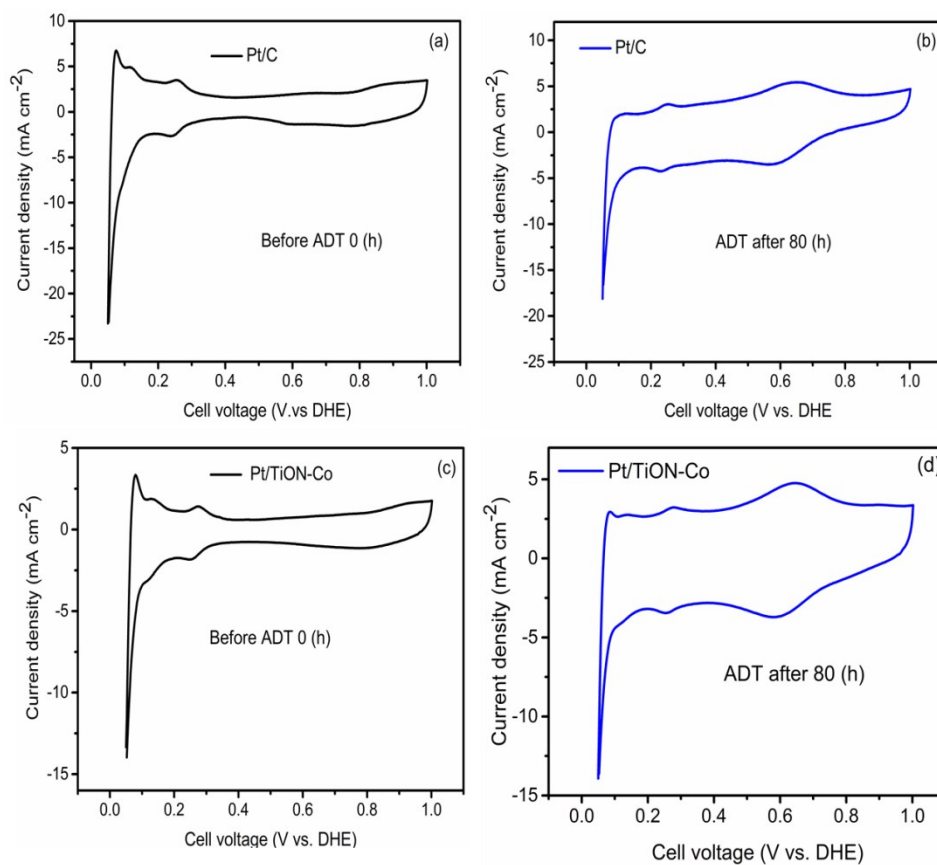

**Fig. 2S.** PEFCs with CV at room temperature with scan rate of 50 mV s<sup>-1</sup>. (a) Pt/C before ADT (b) Pt/C after 80 h of ADT and (c) Pt/TiON-Co before ADT and (d) Pt/TiON-Co after 80 h of ADT.

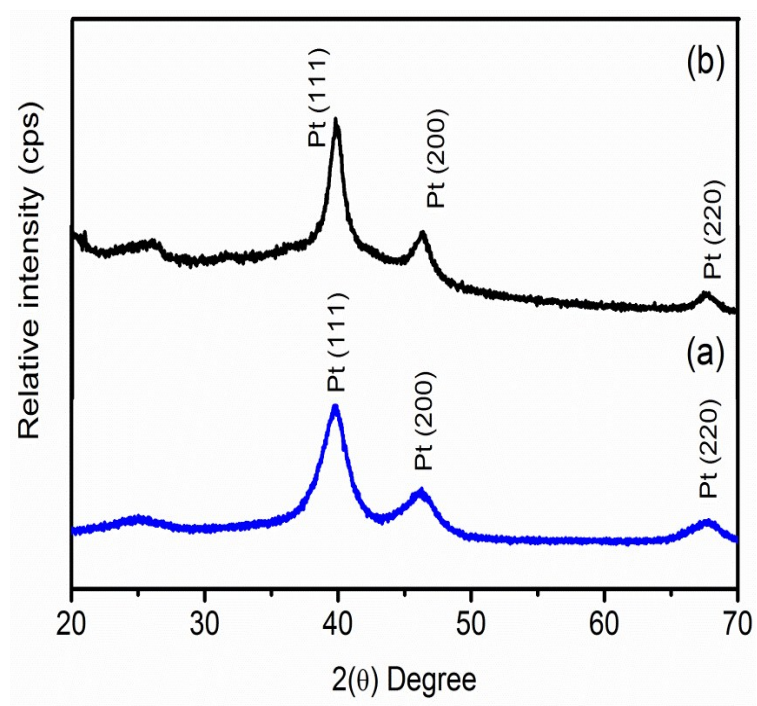

**Fig. 3S.** X-ray diffraction pattern of Pt deposited on carbon (a) before ADT and (b) after 80 h of ADT.

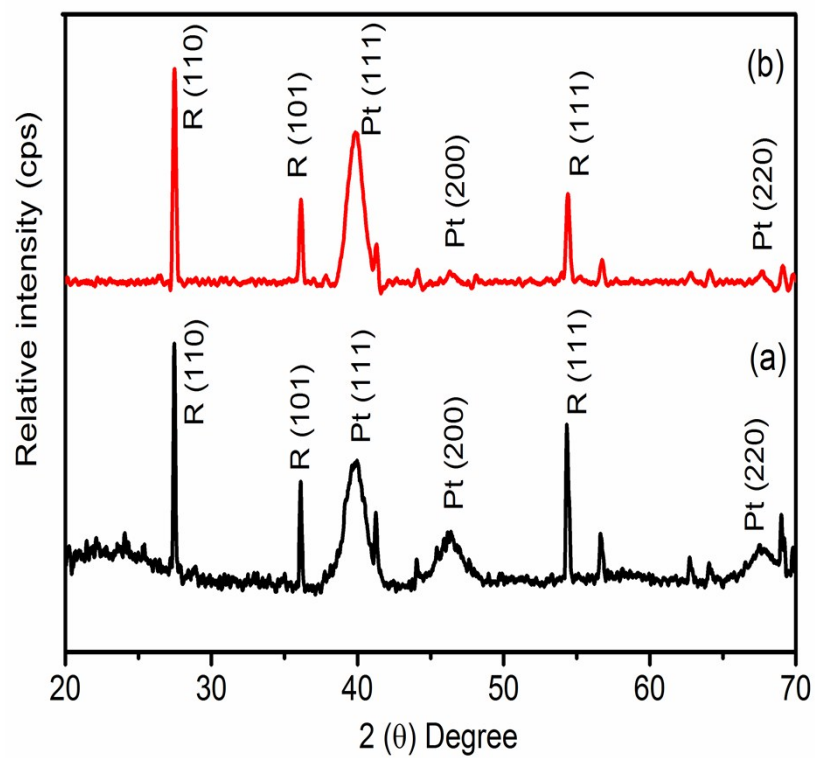

**Fig. 4S.** X-ray diffraction pattern of Pt deposited on TiON-Co electrocatalyst (a) before ADT and (b) after 80 h of ADT.

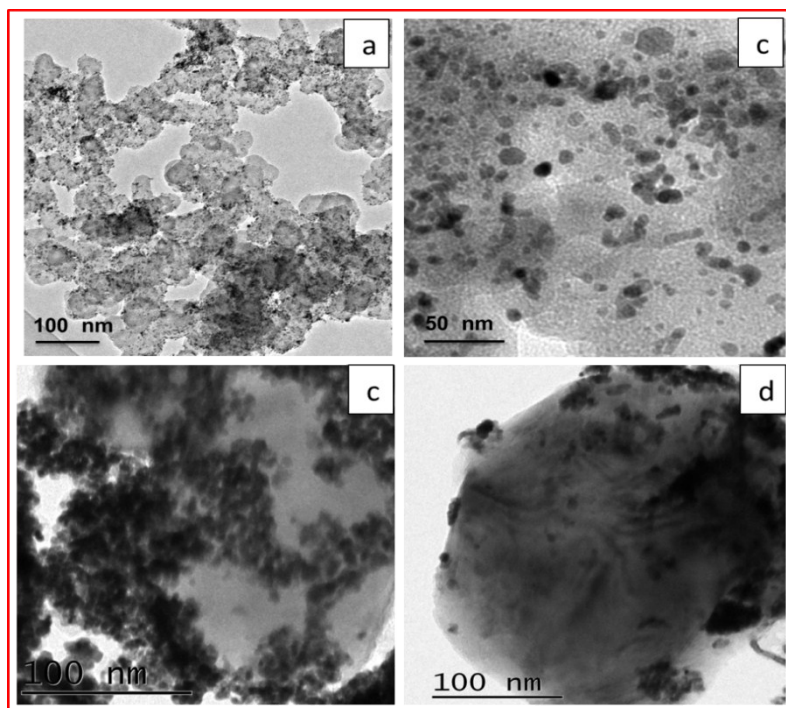

**Fig. 5S.** HR-TEM image of Pt/C and Pt/TiON-Co cathode electrocatalyst (a & b) before ADT, (c & d) after 80 h of ADT.
